# Supplementary material for: Cardiovascular events and death after catheter ablation in very old patients with nonvalvular atrial fibrillation
Source: publisher site journal article supplement (doi:10.18632/aging.204952), 2023-08-14
Supplement: Supplementary file [file aging-v15i15-204952-supplementary-material-SD1.pdf]

**SUPPLEMENTARY FIGURES**

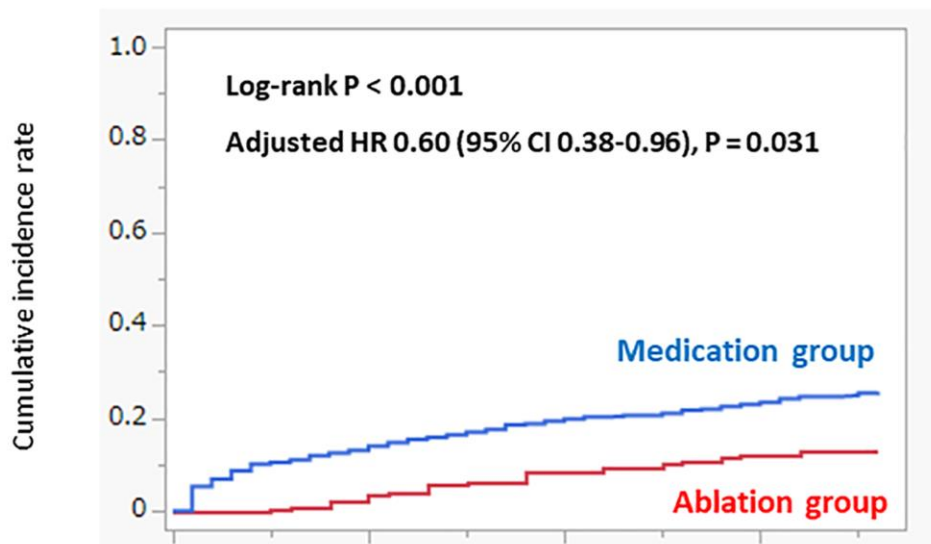

| Interval, month         | 0   | 6    | 12   | 18   | 24   | 30   | 36   |
|-------------------------|-----|------|------|------|------|------|------|
| <b>Medication group</b> |     |      |      |      |      |      |      |
| Number at risk          | 570 | 497  | 447  | 408  | 367  | 318  | 280  |
| Number of events        |     | 62   | 86   | 103  | 112  | 124  | 133  |
| Incidence, %            |     | 11.0 | 15.5 | 18.8 | 20.6 | 23.4 | 25.1 |
| <b>Ablation group</b>   |     |      |      |      |      |      |      |
| Number at risk          | 212 | 211  | 204  | 184  | 139  | 121  | 91   |
| Number of events        |     | 2    | 8    | 17   | 19   | 23   | 24   |
| Incidence, %            |     | 0.9  | 3.8  | 8.2  | 9.5  | 12.2 | 12.9 |

**Supplementary Figure 1. Incidence of cardiovascular events (original total cohort).** The incidence of cardiovascular events within 3 years was significantly lower in the Ablation group than Medication group.

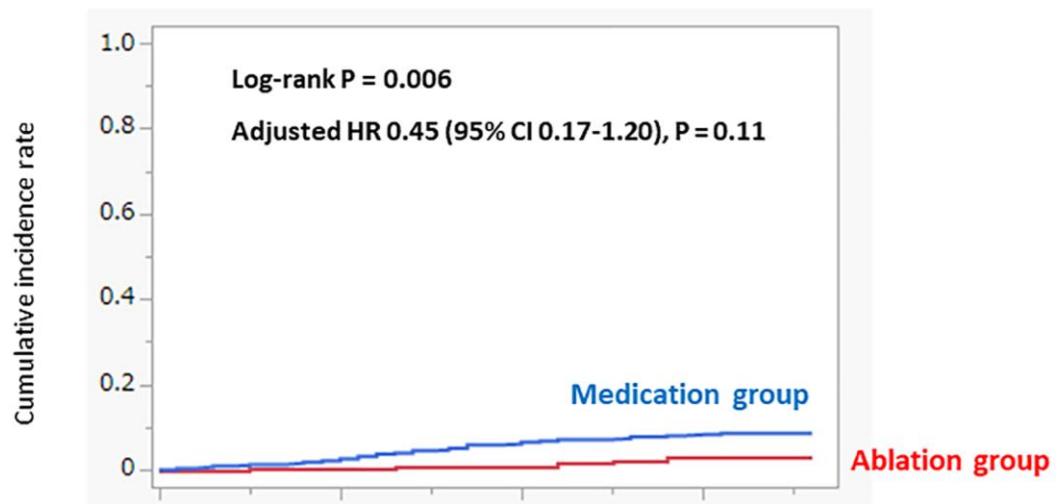

| Interval, month         | 0   | 6   | 12  | 18  | 24  | 30  | 36  |
|-------------------------|-----|-----|-----|-----|-----|-----|-----|
| <b>Medication group</b> |     |     |     |     |     |     |     |
| Number at risk          | 570 | 542 | 502 | 468 | 428 | 375 | 339 |
| Number of events        |     | 7   | 20  | 31  | 37  | 42  | 43  |
| Incidence, %            |     | 1.3 | 3.7 | 5.9 | 7.1 | 8.3 | 8.5 |
| <b>Ablation group</b>   |     |     |     |     |     |     |     |
| Number at risk          | 212 | 212 | 210 | 194 | 151 | 134 | 101 |
| Number of events        |     | 1   | 1   | 2   | 3   | 5   | 5   |
| Incidence, %            |     | 0.5 | 0.5 | 1.0 | 1.6 | 2.9 | 2.9 |

**Supplementary Figure 2. Incidence of cardiovascular death (original total cohort).** The incidence of cardiovascular death within 3 years was significantly lower in the Ablation group than Medication group.

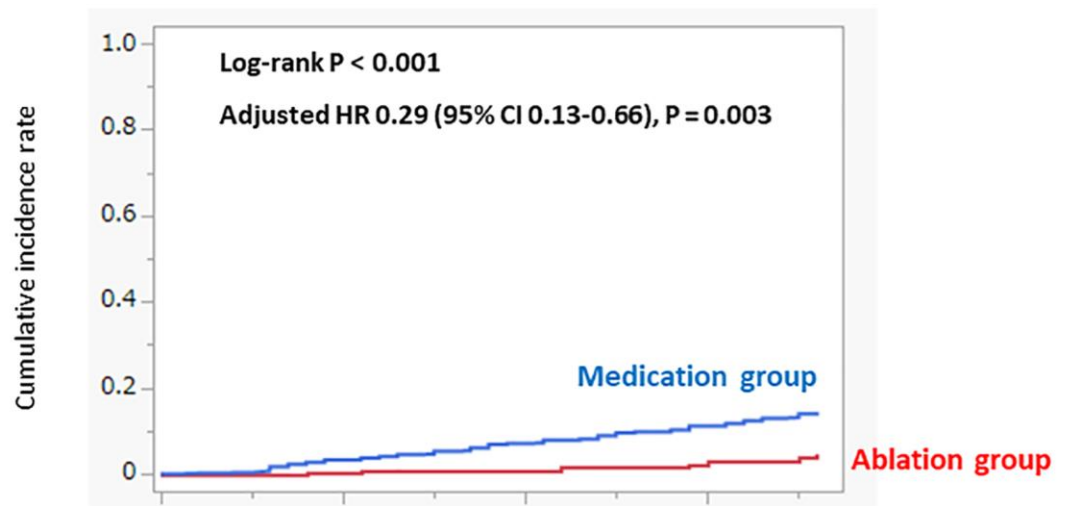

| Interval, month         | 0   | 6   | 12  | 18  | 24  | 30   | 36   |
|-------------------------|-----|-----|-----|-----|-----|------|------|
| <b>Medication group</b> |     |     |     |     |     |      |      |
| Number at risk          | 570 | 542 | 502 | 468 | 428 | 375  | 339  |
| Number of events        |     | 9   | 22  | 36  | 46  | 56   | 69   |
| Incidence, %            |     | 1.6 | 4.1 | 6.8 | 8.9 | 11.2 | 14.4 |
| <b>Ablation group</b>   |     |     |     |     |     |      |      |
| Number at risk          | 212 | 212 | 210 | 194 | 151 | 134  | 101  |
| Number of events        |     | 0   | 2   | 2   | 3   | 5    | 7    |
| Incidence, %            |     | 0   | 1.0 | 1.0 | 1.6 | 3.0  | 4.9  |

**Supplementary Figure 3. Incidence of non-cardiovascular death (original total cohort).** The incidence of non-cardiovascular death within 3 years was significantly lower in the Ablation group than Medication group.

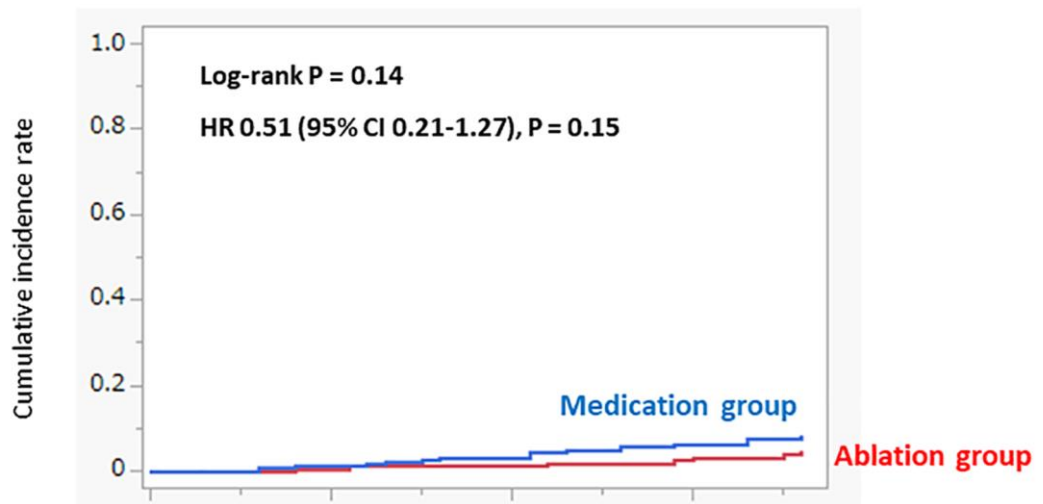

| Interval, month         | 0   | 6   | 12  | 18  | 24  | 30  | 36  |
|-------------------------|-----|-----|-----|-----|-----|-----|-----|
| <b>Medication group</b> |     |     |     |     |     |     |     |
| Number at risk          | 208 | 199 | 188 | 174 | 155 | 141 | 131 |
| Number of events        |     | 1   | 3   | 6   | 9   | 11  | 14  |
| Incidence, %            |     | 0.5 | 1.5 | 3.2 | 4.9 | 6.2 | 8.3 |
| <b>Ablation group</b>   |     |     |     |     |     |     |     |
| Number at risk          | 208 | 208 | 206 | 190 | 149 | 133 | 101 |
| Number of events        |     | 0   | 2   | 2   | 3   | 5   | 7   |
| Incidence, %            |     | 0   | 1.0 | 1.0 | 1.6 | 3.0 | 4.9 |

**Supplementary Figure 4. Incidence of non-cardiovascular death (propensity score matched cohort).** The incidence of non-cardiovascular death within 3 years was similar between the Ablation and Medication groups.
