# Supplementary material for: Cardiovascular events and death after catheter ablation in very old patients with nonvalvular atrial fibrillation
Source: publisher site journal article supplement (doi:10.18632/aging.204952), 2023-08-14
Supplement: Supplementary file [file aging-v15i15-204952-supplementary-material-SD2.pdf]

## SUPPLEMENTARY TABLES

**Supplementary Table 1. Details of the complications during the first-time ablation procedure.**

|                                                 | <b>Ablation group (N = 212)</b> |
|-------------------------------------------------|---------------------------------|
| Perioperative complications, <i>N</i> (%)       | 9 (4.2)                         |
| Cardiac tamponade, <i>N</i> (%)                 | 3 (1.4)                         |
| Sinus node injury, <i>N</i> (%)                 | 1 (0.5)                         |
| Periesophageal vagal nerve injury, <i>N</i> (%) | 1 (0.5)                         |
| Phrenic nerve injury, <i>N</i> (%)              | 3 (1.4)                         |
| Pseudo aneurysm on puncture site, <i>N</i> (%)  | 1 (0.5)                         |
| Death, <i>N</i> (%)                             | 0 (0)                           |

Values are presented as the number of patients (%).

**Supplementary Table 2. Details of the AF characteristics and management in the ablation group patients.**

|                                                       | <b>Patients with paroxysmal AF<br/>(N = 134)</b> | <b>Patients with non-paroxysmal AF<br/>(N = 78)</b> |
|-------------------------------------------------------|--------------------------------------------------|-----------------------------------------------------|
| Symptomatic AF, <i>N</i> (%)                          | 118 (88)                                         | 63 (81)                                             |
| AF persistence duration, month, median (IQR)          | –                                                | 4 (2, 6)                                            |
| Long-standing persistent AF, <i>N</i> (%)             | –                                                | 3 (3.8)                                             |
| AF recurrence after first-time ablation, <i>N</i> (%) | 34 (25)                                          | 20 (26)                                             |
| Second-time ablation, <i>N</i> (%)                    | 13 (9.7)                                         | 4 (5.1)                                             |
| Redo PV isolation, <i>N</i>                           | 5                                                | 3                                                   |
| Redo SVC isolation, <i>N</i>                          | 1                                                | 1                                                   |
| SVC isolation, <i>N</i>                               | 5                                                | 0                                                   |
| Posterior wall isolation, <i>N</i>                    | 3                                                | 2                                                   |
| Mitral isthmus ablation, <i>N</i>                     | 2                                                | 1                                                   |
| Roofline ablation, <i>N</i>                           | 2                                                | 0                                                   |
| Trigger ablation, <i>N</i>                            | 2                                                | 0                                                   |
| Low voltage zone ablation, <i>N</i>                   | 2                                                | 0                                                   |
| Complication, <i>N</i>                                | 0                                                | 0                                                   |
| Permanent form of AF fixing, <i>N</i> , (%)           | 2 (1.5)                                          | 3 (3.8)                                             |
| Anti-arrhythmic drug use, <i>N</i> (%)                | 17 (13)                                          | 18 (23)                                             |
| Amiodarone 50 mg/day, <i>N</i>                        | 6                                                | 5                                                   |
| Amiodarone 100 mg/day, <i>N</i>                       | 1                                                | 2                                                   |
| Amiodarone 200 mg/day, <i>N</i>                       | 0                                                | 1                                                   |
| Bepidil 25 mg/day, <i>N</i>                           | 0                                                | 3                                                   |
| Bepidil 50 mg/day, <i>N</i>                           | 7                                                | 6                                                   |
| Bepidil 100 mg/day, <i>N</i>                          | 0                                                | 1                                                   |
| Pilsicainide 50 mg/day, <i>N</i>                      | 1                                                | 0                                                   |
| Pilsicainide 100 mg/day, <i>N</i>                     | 1                                                | 0                                                   |
| Cibenzoline 50 mg/day, <i>N</i>                       | 1                                                | 0                                                   |
| Aprindine 40 mg/day, <i>N</i>                         | 2                                                | 0                                                   |

Values are presented as the number of patients (%).

**Supplementary Table 3. Details of the cardiovascular events and deaths (original total cohort).**

|                                     | <b>Ablation group<br/>(N = 212)</b> | <b>Medication group<br/>(N = 570)</b> | <b>Adjusted HR<br/>(95% CI)</b> | <b>P-value</b> |
|-------------------------------------|-------------------------------------|---------------------------------------|---------------------------------|----------------|
| Cardiovascular events, N (%)        | 24 (9.4)                            | 133 (23.3)                            | 0.60 (0.38–0.96)                | 0.031          |
| Acute heart failure, N (%)          | 13 (6.1)                            | 79 (13.9)                             | 0.53 (0.28–0.98)                | 0.045          |
| Stroke and systemic embolism, N (%) | 9 (4.2)                             | 38 (6.7)                              | 0.93 (0.42–2.02)                | 0.85           |
| Acute coronary syndrome, N (%)      | 1 (0.5)                             | 8 (1.4)                               | 0.29 (0.03–2.63)                | 0.27           |
| Cardiovascular deaths, N (%)        | 5 (2.4)                             | 43 (7.4)                              | 0.45 (0.17–1.20)                | 0.11           |
| Acute heart failure, N (%)          | 0 (0)                               | 16 (2.8)                              | –                               | –              |
| Stroke and systemic embolism, N (%) | 1 (0.5)                             | 10 (1.8)                              | 0.47 (0.05–4.05)                | 0.49           |
| Acute coronary syndrome, N (%)      | 0 (0)                               | 2 (0.3)                               | –                               | –              |
| Sudden cardiac death, N (%)         | 4 (1.9)                             | 15 (2.6)                              | 0.94 (0.29–3.09)                | 0.92           |

Values are presented as the number of patients (%). Abbreviation: HR: hazard ratio.

**Supplementary Table 4. Predictors of cardiovascular events (original total cohort).**

|                                     | <b>Univariable</b> |               |                | <b>Multivariable</b> |               |                |
|-------------------------------------|--------------------|---------------|----------------|----------------------|---------------|----------------|
|                                     | <b>HR</b>          | <b>95% CI</b> | <b>P-value</b> | <b>HR</b>            | <b>95% CI</b> | <b>P-value</b> |
| Heart failure                       | 2.77               | 1.98–3.88     | <0.001         | 2.49                 | 1.77–3.52     | <0.001         |
| Non-paroxysmal AF                   | 1.71               | 1.20–2.44     | 0.003          | 1.62                 | 1.11–2.36     | 0.012          |
| Age ≥85 years                       | 1.75               | 1.28–2.39     | <0.001         | 1.46                 | 1.05–2.02     | 0.024          |
| History of a thromboembolism        | 1.47               | 1.01–2.13     | 0.042          | 1.47                 | 1.00–2.16     | 0.048          |
| Body weight ≤50 kg                  | 1.59               | 1.16–2.18     | 0.004          | 1.32                 | 0.94–1.86     | 0.11           |
| Female sex                          | 1.27               | 0.93–1.74     | 0.13           | 1.16                 | 0.83–1.63     | 0.39           |
| Diabetes mellitus                   | 1.21               | 0.83–1.77     | 0.32           | 1.14                 | 0.77–1.69     | 0.50           |
| Hypertension                        | 1.05               | 0.73–1.51     | 0.81           | 1.10                 | 0.76–1.60     | 0.61           |
| eGFR <60 mL/min/1.73 m <sup>2</sup> | 1.33               | 0.95–1.86     | 0.10           | 1.08                 | 0.77–1.53     | 0.65           |
| Catheter ablation                   | 0.44               | 0.28–0.68     | <0.001         | 0.60                 | 0.38–0.96     | 0.031          |

Abbreviations: AF: atrial fibrillation; CI: confidence interval; eGFR: estimated glomerular filtration rate; HR: hazard ratio.

**Supplementary Table 5. Predictors of cardiovascular death (original total cohort).**

|                    | <b>Univariable</b> |               |                | <b>Multivariable</b> |               |                |
|--------------------|--------------------|---------------|----------------|----------------------|---------------|----------------|
|                    | <b>HR</b>          | <b>95% CI</b> | <b>P-value</b> | <b>HR</b>            | <b>95% CI</b> | <b>P-value</b> |
| Heart failure      | 2.94               | 1.58–5.47     | <0.001         | 2.46                 | 1.31–4.61     | 0.005          |
| Age ≥85 years      | 2.35               | 1.33–4.15     | 0.003          | 1.82                 | 1.02–3.28     | 0.044          |
| Body weight ≤50 kg | 2.28               | 1.29–4.01     | 0.004          | 1.70                 | 1.04–3.30     | 0.038          |
| Non-paroxysmal AF  | 2.05               | 1.43–4.01     | 0.037          | 1.77                 | 0.88–3.55     | 0.11           |
| Catheter ablation  | 0.30               | 0.12–0.74     | 0.010          | 0.45                 | 0.17–1.20     | 0.11           |

Abbreviations: AF: atrial fibrillation; CI: confidence interval; HR: hazard ratio.

**Supplementary Table 6. Details of the non-cardiovascular deaths (original total cohort).**

|                                         | <b>Ablation group<br/>(N = 212)</b> | <b>Medication group<br/>(N = 570)</b> | <b>Adjusted HR<br/>(95% CI)</b> | <b>P-value</b> |
|-----------------------------------------|-------------------------------------|---------------------------------------|---------------------------------|----------------|
| Non-cardiovascular deaths, <i>N</i> (%) | 7 (3.3)                             | 69 (12.1)                             | 0.29 (0.13–0.66)                | 0.003          |
| Infection, <i>N</i> (%)                 | 0 (0)                               | 15 (2.6)                              | –                               | –              |
| Cancer, <i>N</i> (%)                    | 3 (1.4)                             | 13 (2.3)                              | 0.51 (0.14–1.94)                | 0.32           |
| Respiratory failure, <i>N</i> (%)       | 2 (0.9)                             | 14 (2.5)                              | 0.51 (0.11–2.43)                | 0.40           |
| Other/unknown, <i>N</i> (%)             | 2 (0.9)                             | 27 (4.7)                              | 0.24 (0.05–1.03)                | 0.06           |

Values are presented as the number of patients (%). Abbreviation: HR: hazard ratio.

**Supplementary Table 7. Details of the non-cardiovascular deaths (propensity score matched cohort).**

|                                         | <b>Ablation group<br/>(N = 208)</b> | <b>Medication group<br/>(N = 208)</b> | <b>HR (95% CI)</b> | <b>P-value</b> |
|-----------------------------------------|-------------------------------------|---------------------------------------|--------------------|----------------|
| Non-cardiovascular deaths, <i>N</i> (%) | 7 (3.4)                             | 14 (6.7)                              | 0.51 (0.21–1.27)   | 0.15           |
| Infection, <i>N</i> (%)                 | 0 (0)                               | 3 (1.4)                               | –                  | –              |
| Cancer, <i>N</i> (%)                    | 3 (1.4)                             | 5 (2.4)                               | 0.65 (0.15–2.73)   | 0.56           |
| Respiratory failure, <i>N</i> (%)       | 2 (1.0)                             | 3 (1.4)                               | 0.69 (0.11–4.10)   | 0.68           |
| Other/unknown, <i>N</i> (%)             | 2 (1.0)                             | 3 (1.4)                               | 0.67 (0.11–4.01)   | 0.66           |

Values are presented as the number of patients (%). Abbreviation: HR: hazard ratio.
